# Supplementary material for: Ghost Gears in the Gulf of Gabès: Alarming Situation and Sustainable Solution Perspectives
Source: MDPI journal article supplement (doi:10.3390/su16072632), 2024-03-22
Supplement: s1 [file s1]

**Table S2: Multiple regression analysis results for all fishing gear studied using SPSS software**

**A:** Trawl net; **B:** Encircling net; **C:** Gill net; **D:** Trammel net; **E:** Longlines

**N:** number of vessels, **(1):** the number of gear used per fishing vessel, **(2):** the depth of fishing activity (in meters), **(3):** the tonnage of the fishing vessel (in tons), **(4):** the length of the boat (in meters), **(5):** the average fishery months per year, **(6):** the average number of fishing days per month, **(7):** the annual number of pieces of nets or number of long line's hooks used, **(8):** the number of sets per 24h, **(9):** Soak time (in hour), **(10):** the annual frequency of replacement of the fishing gear and **(11):** the annual number of parts of fishing gears abandoned per fishing vessel.

**A**

| Coefficients <sup>a</sup> |                              |       |                          |        |       |
|---------------------------|------------------------------|-------|--------------------------|--------|-------|
| Model (Trawl)             | Non-Standardised coefficient |       | Standardised coefficient | t      | Sig.  |
|                           | B                            | SD    | Bêta                     |        |       |
| 1 (Constant)              | -4.390                       | 1.836 |                          | -2.391 | 0.021 |
| 2                         | 0.032                        | 0.010 | 0.130                    | 3.139  | 0.003 |
| 3                         | -0.018                       | 0.008 | -0.339                   | -2.355 | 0.022 |
| 4                         | 0.168                        | 0.103 | 0.221                    | 1.637  | 0.108 |
| 6                         | -0.010                       | 0.025 | -0.017                   | -0.386 | 0.701 |
| 5                         | -0.084                       | 0.085 | -0.043                   | -0.987 | 0.329 |
| 8                         | 0.121                        | 0.056 | 0.111                    | 2.136  | 0.038 |
| 11                        | 0.450                        | 0.082 | 0.374                    | 5.493  | 0.000 |
| 9                         | 0.324                        | 0.216 | 0.067                    | 1.505  | 0.139 |
| 10                        | 0.462                        | 0.064 | 0.440                    | 7.215  | 0.000 |

0

| Model (trawl) |            | Collinearity |       |
|---------------|------------|--------------|-------|
|               |            | Tolerance    | VIF   |
| 1             | (Constant) |              |       |
|               | 2          | .936         | 1.068 |
|               | 3          | 0.1          | 9.86  |
|               | 4          | 0.1          | 10    |
|               | 6          | 0.794        | 1.260 |
|               | 5          | 0.828        | 1.208 |
|               | 8          | 0.587        | 1.703 |
|               | 11         | 0.345        | 2.900 |
|               | 9          | 0.799        | 1.251 |
|               | 10         | 0.430        | 2.327 |

a. Dependant Variable : Number of ALDFG

**B****Coefficients<sup>a</sup>**

| Model ( <b>Encircling</b> ) |            | Non-Standardised coefficient |       | Standardised coefficient | t      | Sig.  |
|-----------------------------|------------|------------------------------|-------|--------------------------|--------|-------|
|                             |            | B                            | SD    | Bêta                     |        |       |
| 1                           | (Constant) | 2.584                        | 2.117 |                          | 1.221  | 0.237 |
|                             | 2          | -0.039                       | 0.018 | -0.246                   | -2.181 | 0.042 |
|                             | 3          | 0.001                        | 0.012 | 0.006                    | 0.048  | 0.962 |
|                             | 4          | -0.024                       | 0.049 | -0.054                   | -0.477 | 0.639 |
|                             | 6          | -0.053                       | 0.038 | -0.142                   | -1.371 | 0.186 |
|                             | 5          | -0.062                       | 0.115 | -0.061                   | -0.538 | 0.597 |
|                             | 7          | -0.553                       | 1.989 | -1.355                   | -0.278 | 0.784 |
|                             | 8          | -0.116                       | 0.134 | -0.081                   | -0.869 | 0.396 |
|                             | 9          | 0.301                        | 0.311 | 0.102                    | 0.966  | 0.346 |
|                             | 10         | 0.016                        | 0.223 | 0.007                    | 0.070  | 0.945 |
|                             | 11         | 0.909                        | 0.152 | 0.722                    | 5.989  | 0.000 |

**Coefficients<sup>a</sup>**

| Model ( <b>encircling</b> ) |            | Collinearity |          |
|-----------------------------|------------|--------------|----------|
|                             |            | Tolerance    | VIF      |
| 1                           | (Constant) |              |          |
|                             | 2          | 0.579        | 1.729    |
|                             | 3          | 0.471        | 2.121    |
|                             | 4          | 0.565        | 1.771    |
|                             | 6          | 0.688        | 1.453    |
|                             | 5          | 0.570        | 1.755    |
|                             | 7          | 0.000        | 3235.306 |
|                             | 8          | 0.842        | 1.188    |
|                             | 9          | 0.662        | 1.511    |
|                             | 10         | 0.808        | 1.238    |
|                             | 11         | 0.505        | 1.981    |

C

Coefficients<sup>a</sup>

| Model (Gill net) |            | Non-Standardised coefficient |       | Standardised coefficient | t      | Sig.  |
|------------------|------------|------------------------------|-------|--------------------------|--------|-------|
|                  |            | B                            | SD    | Bêta                     |        |       |
| 1                | (Constant) | -21.934                      | 3.476 |                          | -6.309 | 0.000 |
|                  | 11         | 0.596                        | 0.093 | 0.348                    | 6.440  | 0.000 |
|                  | 9          | 0.475                        | 0.166 | 0.109                    | 2.856  | 0.005 |
|                  | 8          | 0.418                        | 0.330 | 0.051                    | 1.268  | 0.207 |
|                  | 10         | 4.567                        | 0.993 | 0.170                    | 4.600  | 0.000 |
|                  | 7          | 0.292                        | 0.118 | 0.561                    | 2.484  | 0.014 |
|                  | 5          | 0.329                        | 0.186 | 0.064                    | 1.773  | 0.078 |
|                  | 6          | 0.707                        | 0.110 | 0.252                    | 6.433  | 0.000 |
|                  | 4          | 0.313                        | 0.204 | 0.081                    | 1.539  | 0.126 |
|                  | 3          | -0.059                       | 0.051 | -0.058                   | -1.171 | 0.243 |
|                  | 2          | -0.043                       | 0.057 | -0.030                   | -0.746 | 0.457 |
|                  | 1          | 0.223                        | 0.779 | 0.011                    | 0.286  | 0.775 |

Coefficients<sup>a</sup>

| Model (Gill net) |            | Collinearity |       |
|------------------|------------|--------------|-------|
|                  |            | Tolerance    | VIF   |
| 1                | (Constant) |              |       |
|                  | 11         | 0.410        | 2.441 |
|                  | 9          | 0.821        | 1.217 |
|                  | 8          | 0.747        | 1.339 |
|                  | 10         | 0.880        | 1.137 |
|                  | 7          | 0.132        | 9.89  |
|                  | 5          | 0.922        | 1.084 |
|                  | 6          | 0.782        | 1.279 |
|                  | 4          | 0.429        | 2.329 |
|                  | 3          | 0.495        | 2.019 |
|                  | 2          | 0.728        | 1.374 |
|                  | 1          | 0.801        | 1.248 |

**D**

**Coefficients<sup>a</sup>**

| Model (trammel net) |            | Non-Standardised coefficient |       | Standardised coefficient | t      | Sig.  |
|---------------------|------------|------------------------------|-------|--------------------------|--------|-------|
|                     |            | B                            | SD    | Bêta                     |        |       |
| 1                   | (Constant) | 7.181                        | 9.897 |                          | 0.726  | 0.469 |
|                     | 1          | -2.899                       | 2.050 | -0.065                   | -1.414 | 0.159 |
|                     | 2          | 0.115                        | 0.188 | 0.037                    | 0.612  | 0.541 |
|                     | 3          | 0.045                        | 0.102 | 0.022                    | 0.439  | 0.661 |
|                     | 4          | -0.070                       | 0.585 | -0.007                   | -0.119 | 0.905 |
|                     | 6          | 0.421                        | 0.274 | 0.059                    | 1.535  | 0.127 |
|                     | 5          | -0.013                       | 0.428 | -0.001                   | -0.030 | 0.976 |
|                     | 7          | 0.140                        | 0.048 | 0.221                    | 2.920  | 0.004 |
|                     | 10         | 2.269                        | 1.471 | 0.066                    | 1.543  | 0.125 |
|                     | 8          | -3.127                       | 1.660 | -0.089                   | -1.884 | 0.061 |
|                     | 9          | -1.047                       | 0.307 | -0.144                   | -3.405 | 0.001 |
|                     | 11         | 1.399                        | 0.120 | 0.722                    | 11.673 | 0.000 |

**Coefficients<sup>a</sup>**

| Model (trammel net) |            | Collinearity |       |
|---------------------|------------|--------------|-------|
|                     |            | Tolerance    | VIF   |
| 1                   | (Constant) |              |       |
|                     | 1          | 0.598        | 1.671 |
|                     | 2          | 0.349        | 2.868 |
|                     | 3          | 0.497        | 2.013 |
|                     | 4          | 0.340        | 2.944 |
|                     | 6          | 0.860        | 1.163 |
|                     | 5          | 0.869        | 1.151 |
|                     | 7          | 0.220        | 4.554 |
|                     | 10         | 0.677        | 1.478 |
|                     | 8          | 0.562        | 1.779 |
|                     | 9          | 0.700        | 1.429 |
|                     | 11         | 0.328        | 3.052 |

E

Coefficients<sup>a</sup>

| Model (longlines) |             | Non-Standardised coefficient |         | Standardised coefficient | t      | Sig.  |
|-------------------|-------------|------------------------------|---------|--------------------------|--------|-------|
|                   |             | B                            | SD      | Bêta                     |        |       |
| 1                 | (Constante) | -1079.502                    | 670.034 |                          | -1.611 | 0.114 |
|                   | 11          | 0.774                        | 0.155   | 0.510                    | 4.982  | 0.000 |
|                   | 10          | 117.429                      | 73.594  | 0.111                    | 1.596  | 0.118 |
|                   | 1           | 167.676                      | 82.452  | 0.163                    | 2.034  | 0.048 |
|                   | 2           | 7.793                        | 4.293   | 0.132                    | 1.815  | 0.076 |
|                   | 3           | 15.340                       | 8.935   | 0.216                    | 1.717  | 0.093 |
|                   | 4           | -58.100                      | 28.257  | -0.229                   | -2.056 | 0.046 |
|                   | 6           | 0.234                        | 14.892  | 0.001                    | 0.016  | 0.988 |
|                   | 5           | -9.069                       | 23.921  | -0.029                   | -0.379 | 0.706 |
|                   | 7           | 0.286                        | 0.075   | 0.426                    | 3.838  | 0.000 |
|                   | 8           | 121.459                      | 136.857 | 0.081                    | 0.887  | 0.380 |
|                   | 9           | 43.836                       | 35.309  | 0.124                    | 1.242  | 0.221 |

Coefficients<sup>a</sup>

| Model (longlines) |             | Collinearity |       |
|-------------------|-------------|--------------|-------|
|                   |             | Tolerance    | VIF   |
| 1                 | (Constante) |              |       |
|                   | 11          | 0.389        | 2.573 |
|                   | 10          | 0.838        | 1.194 |
|                   | 1           | 0.639        | 1.566 |
|                   | 2           | 0.770        | 1.299 |
|                   | 3           | 0.257        | 3.886 |
|                   | 4           | 0.330        | 3.028 |
|                   | 6           | 0.784        | 1.276 |
|                   | 5           | 0.698        | 1.433 |
|                   | 7           | 0.331        | 3.018 |
|                   | 8           | 0.494        | 2.023 |
|                   | 9           | 0.406        | 2.463 |
