# Supplementary material for: Ghost Gears in the Gulf of Gabès: Alarming Situation and Sustainable Solution Perspectives
Source: MDPI journal article supplement (doi:10.3390/su16072632), 2024-03-22
Supplement: s1 [file s1]

**Table S1: Descriptive analysis results for all fishing gear studied using SPSS software**

**A:** Trawl net; **B:** Encircling net; **C:** Gill net; **D:** Trammel net; **E:** Longlines

**N:** number of vessels, **(1):** the number of gear used per fishing vessel, **(2):** the depth of fishing activity (in meters), **(3):** the tonnage of the fishing vessel (in tons), **(4):** the length of the boat (in meters), **(5):** the average fishery months per year, **(6):** the average number of fishing days per month, **(7):** the annual number of pieces of nets or number of long line's hooks used, **(8):** the number of sets per 24h, **(9):** Soak time (in hour), **(10):** the annual frequency of replacement of the fishing gear and **(11):** the annual number of parts of fishing gears abandoned per fishing vessel.

**A**

| Trawl descriptive analysis |         |          |    |
|----------------------------|---------|----------|----|
|                            | Mean    | SD       | N  |
| 2                          | 44.51   | 8.990    | 61 |
| 3                          | 94.7705 | 42.47014 | 61 |
| 4                          | 23.9674 | 2.94705  | 61 |
| 6                          | 17.23   | 4.088    | 61 |
| 5                          | 9.08    | 1.159    | 61 |
| 8                          | 8.69    | 2.078    | 61 |
| 11                         | 1.56    | 1.867    | 61 |
| 9                          | 1.6516  | 0.46610  | 61 |
| 10                         | 3.13    | 2.141    | 61 |

**B**

| Encircling descriptive analysis |         |          |    |
|---------------------------------|---------|----------|----|
|                                 | Mean    | SD       | N  |
| 1                               | 1.000   | .0000    | 31 |
| 2                               | 34.4839 | 12.84230 | 31 |
| 3                               | 28.5113 | 20.98971 | 31 |
| 4                               | 17.8287 | 4.77182  | 31 |
| 6                               | 17.903  | 5.5399   | 31 |
| 5                               | 10.968  | 2.0410   | 31 |
| 7                               | 1094.84 | 507.306  | 31 |
| 8                               | 2.74    | 1.437    | 31 |
| 9                               | 1.5403  | 0.69850  | 31 |
| 10                              | 1.23    | 0.884    | 31 |
| 11                              | 1.097   | 1.6402   | 31 |

**C****Gill net descriptive analysis**

|    | Mean    | SD       | N   |
|----|---------|----------|-----|
| 11 | 4.30    | 9.617    | 173 |
| 9  | 3.0260  | 3.77627  | 173 |
| 8  | 3.16    | 1.998    | 173 |
| 10 | 1.30    | 0.612    | 173 |
| 7  | 35.56   | 31.613   | 173 |
| 5  | 9.22    | 3.193    | 173 |
| 6  | 15.03   | 5.862    | 173 |
| 4  | 9.4724  | 4.26965  | 173 |
| 3  | 10.1488 | 16.00276 | 173 |
| 2  | 16.29   | 11.682   | 173 |
| 1  | 1.769   | 0.8168   | 173 |

**D****Trammel net descriptive analysis**

|    | Mean    | SD       | N   |
|----|---------|----------|-----|
| 1  | 1.694   | .7696    | 170 |
| 2  | 20.35   | 10.981   | 170 |
| 3  | 10.5038 | 16.95754 | 170 |
| 4  | 9.2741  | 3.57792  | 170 |
| 6  | 16.21   | 4.802    | 170 |
| 5  | 9.76    | 3.062    | 170 |
| 7  | 74.71   | 54.354   | 170 |
| 10 | 1.92    | 1.009    | 170 |
| 8  | 1.28    | 0.980    | 170 |
| 9  | 10.7147 | 4.74516  | 170 |
| 11 | 12.20   | 17.790   | 170 |

**E**

**Longlines descriptive analysis**

|    | Mean    | SD       | N  |
|----|---------|----------|----|
| 11 | 257.32  | 697.360  | 56 |
| 10 | 1.61    | 1.003    | 56 |
| 1  | 2.304   | 1.0255   | 56 |
| 2  | 34.4643 | 17.93723 | 56 |
| 3  | 12.7045 | 14.90777 | 56 |
| 4  | 10.9473 | 4.16107  | 56 |
| 6  | 12.80   | 5.125    | 56 |
| 5  | 8.80    | 3.381    | 56 |
| 7  | 2076.79 | 1575.031 | 56 |
| 8  | 1.38    | 0.702    | 56 |
| 9  | 8.8214  | 3.00368  | 56 |
